# Supplementary material
Source: PubMed Central journal article supplement (PMC8886528)
Supplement: EMBJ-41-e109256-s007.pdf [file EMBJ-41-e109256-s007.pdf]

# **Transient ribosome slowdown during decoding triggers mRNA decay independent of Znf598 in zebrafish**

## **Appendix**

### **Table of contents**

|                                                     |   |
|-----------------------------------------------------|---|
| Appendix table S1: List of Primers.....             | 2 |
| Appendix table S2: List of codon tag sequences..... | 3 |
